# Supplementary material for: A single-cell atlas of West African lungfish respiratory system reveals evolutionary adaptations to terrestrialization
Source: PubMed Central journal article supplement (PMC10497629; doi:10.1038/s41467-023-41309-3), 2023-09-13
Supplement: 41467_2023_41309_MOESM1_ESM.pdf [file 41467_2023_41309_MOESM1_ESM.pdf]

# Vertebrate respiratory system insights from West African lungfish lung and gill single-cell transcriptomes

Ruihua Zhang<sup>1,2,3,#</sup>, Qun Liu<sup>2,3,4,#</sup>, Shanshan Pan<sup>2,3,#</sup>, Yingying Zhang<sup>2,3</sup>, Yating Qin<sup>2,3</sup>, Xiao Du<sup>2,3,5</sup>, Zengbao Yuan<sup>1,2,3</sup>, Yongrui Lu<sup>6</sup>, Yue Song<sup>2,3</sup>, Mengqi Zhang<sup>2</sup>, Nannan Zhang<sup>2,3</sup>, Jie Ma<sup>2,3</sup>, Zhe Zhang<sup>7</sup>, Xiaodong Jia<sup>8</sup>, Kun Wang<sup>9</sup>, Shunping He<sup>6</sup>, Shanshan Liu<sup>5,7</sup>, Ming Ni<sup>5,7</sup>, Xin Liu<sup>5</sup>, Xun Xu<sup>5,10</sup>, Huanming Yang<sup>5</sup>, Jian Wang<sup>5</sup>, Inge Seim<sup>11,12\*</sup>, Guangyi Fan<sup>2,3,5\*</sup>

<sup>1</sup>College of Life Sciences, University of Chinese Academy of Sciences, Beijing 100049, China

<sup>2</sup>BGI Research, Qingdao 266555, China

<sup>3</sup>Qingdao Key Laboratory of Marine Genomics, BGI Research, Qingdao 266555, China

<sup>4</sup>Department of Biology, University of Copenhagen, Copenhagen 2100, Denmark

<sup>5</sup>BGI Research, Shenzhen 518083, China

<sup>6</sup>State Key Laboratory of Freshwater Ecology and Biotechnology, Institute of Hydrobiology, Chinese Academy of Sciences, Wuhan 430072, China.

<sup>7</sup>MGI Tech, Shenzhen, 518083, China

<sup>8</sup>Joint Laboratory for Translational Medicine Research, Liaocheng People's Hospital, Liaocheng 252000, Shandong, P.R. China

<sup>9</sup>Center for Ecological and Environmental Sciences, Northwestern Polytechnical University, Xi'an 710072, China

<sup>10</sup>Guangdong Provincial Key Laboratory of Genome Read and Write, BGI Research, Shenzhen 518083, China

<sup>11</sup>Integrative Biology Laboratory, College of Life Sciences, Nanjing Normal University, Nanjing, China.

<sup>12</sup> School of Biology and Environmental Science, Queensland University of Technology, Brisbane, 4000, Australia

#These authors contributed equally.

\*Correspondence: [fanguangyi@genomics.cn](mailto:fanguangyi@genomics.cn) (G.F.) and [inge@seimlab.org](mailto:inge@seimlab.org) (I.S.).

**a**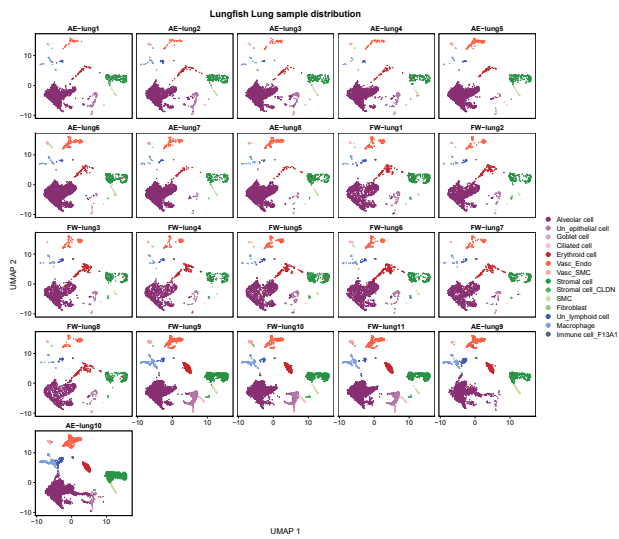**b**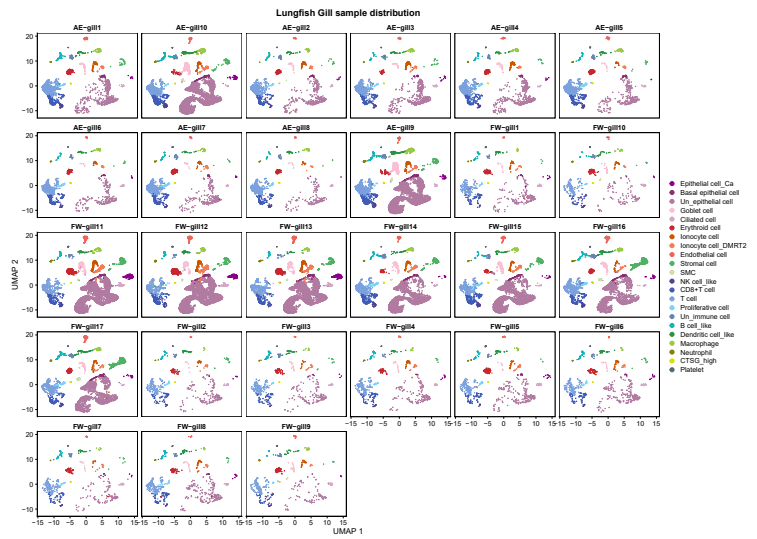**c**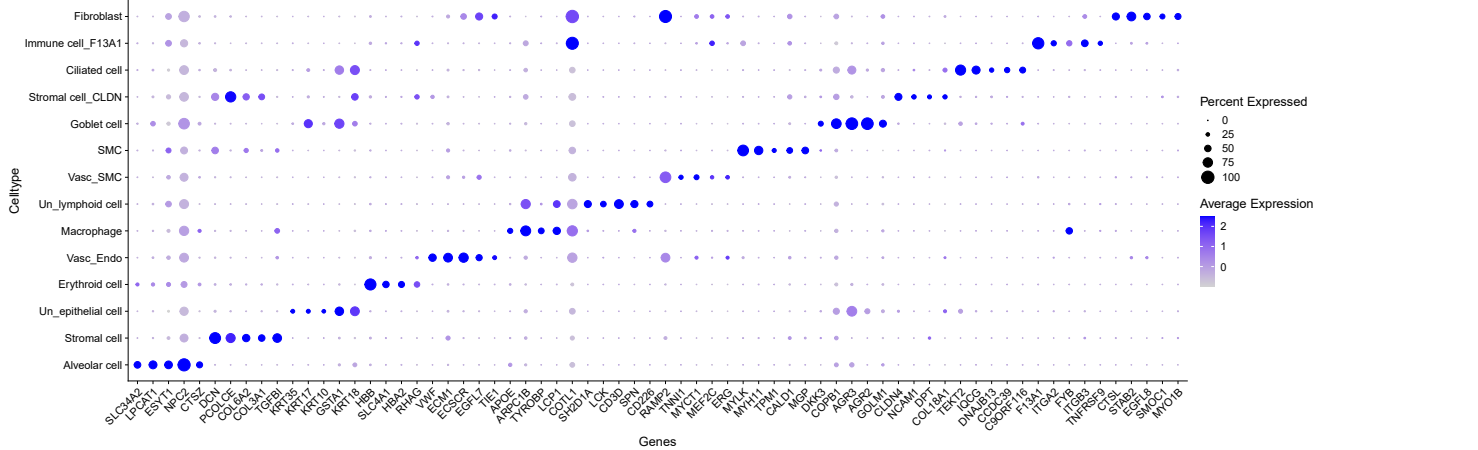**d**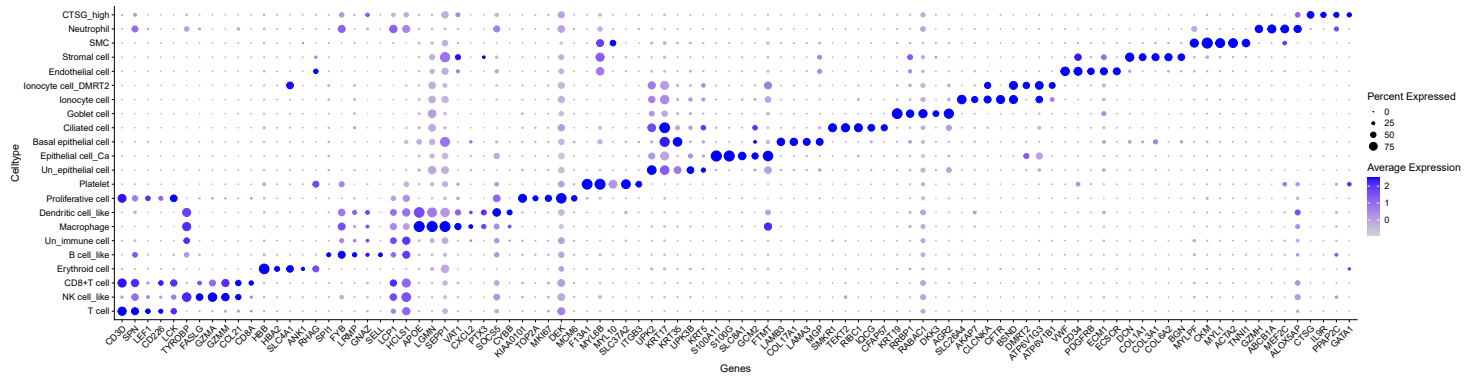**e**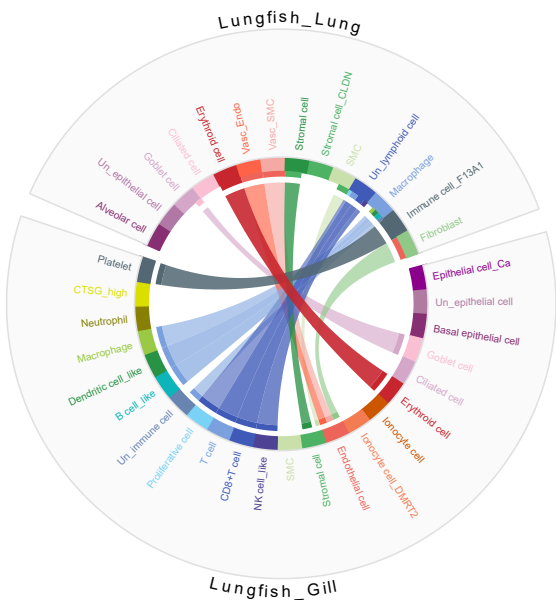**f**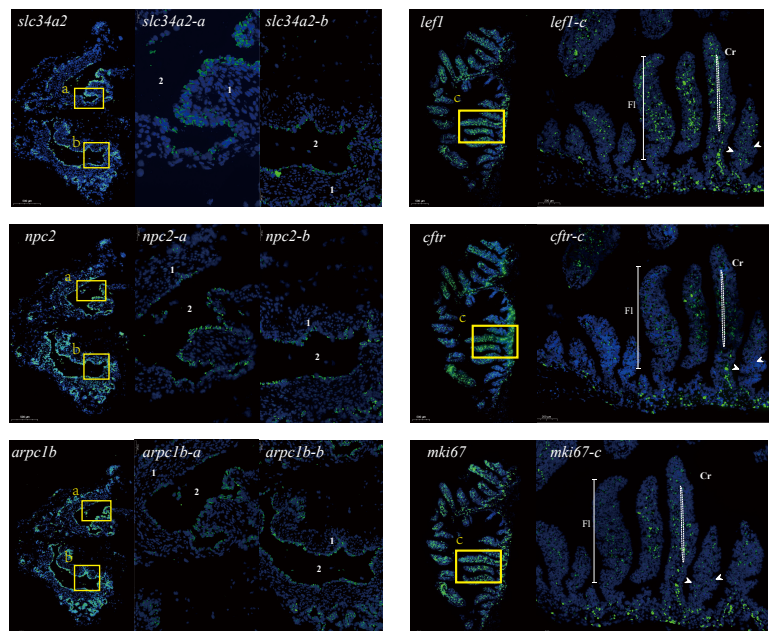

**Supplementary Figure 1 | Single cell RNA-seq data composition and features expression, related to Fig1.** **a**, Uniform Manifold Approximation and Projection of lung cell types from single individuals. Annotated as in Fig.1b. **b**, Uniform Manifold Approximation and Projection of gill cell types from single individuals. Annotated as in Fig.1c. **c**, Bubble plot of selected marker genes within each cell type of lung. Color shows the expression levels from grey (low expression level) to blue (high expression level). Circle size reflects the percentage of cells within a cell type which express the specific genes. **d**, Bubble plot of selected marker genes within each cell type of gill. Annotated as in a. **e**, Cell-cell similarities between the lungfish gill and lungfish lung. The top 5% highest Kullback–Leibler divergence (KDL) values are indicated as arches connecting cell types. **f**, Partial enlarged drawing of fluorescence microscopy image of lungfish lung and gills in Fig.1d, e. Each slide is repeated independently 3~5 times. Scalebar, as labeled on the figure.

a

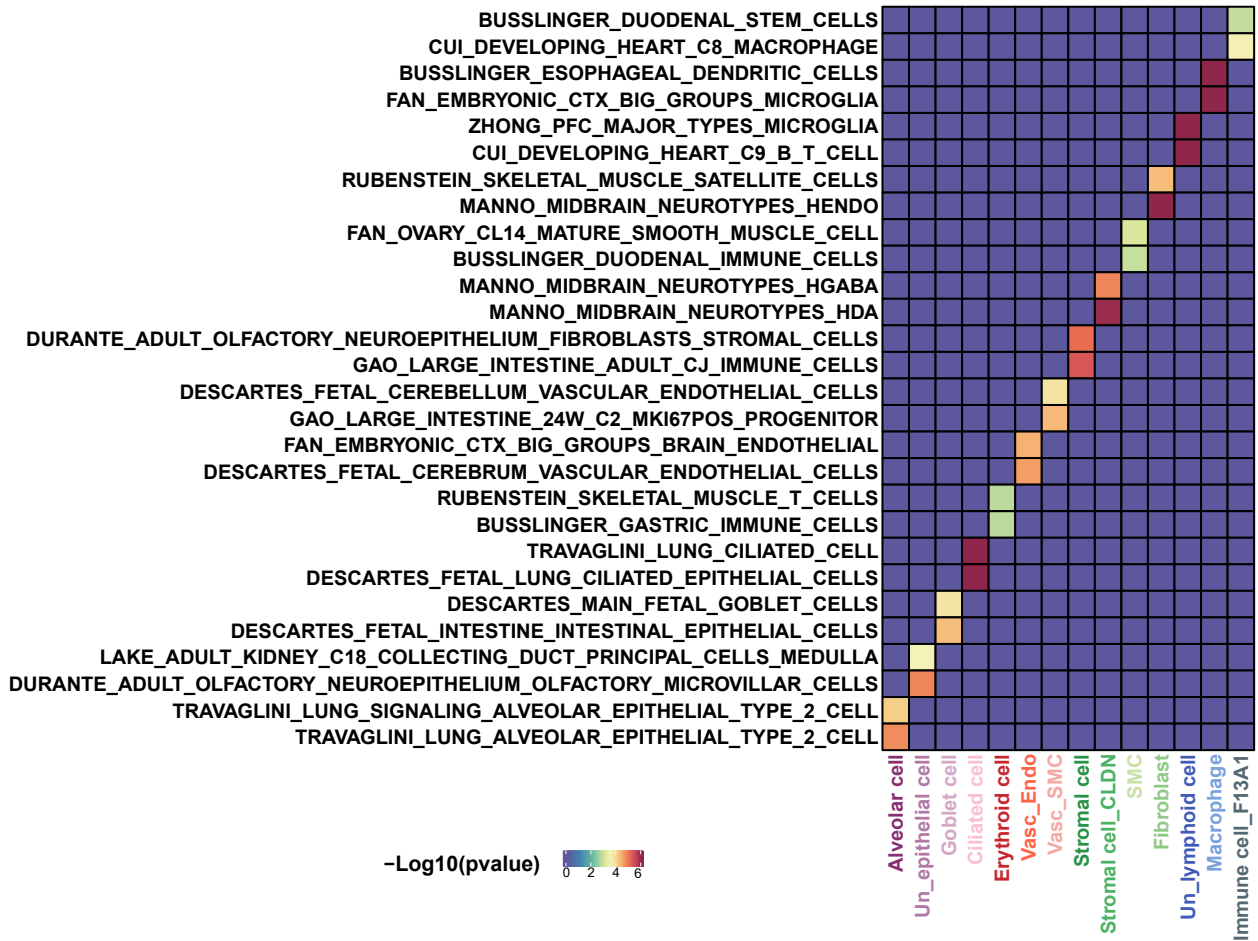

b

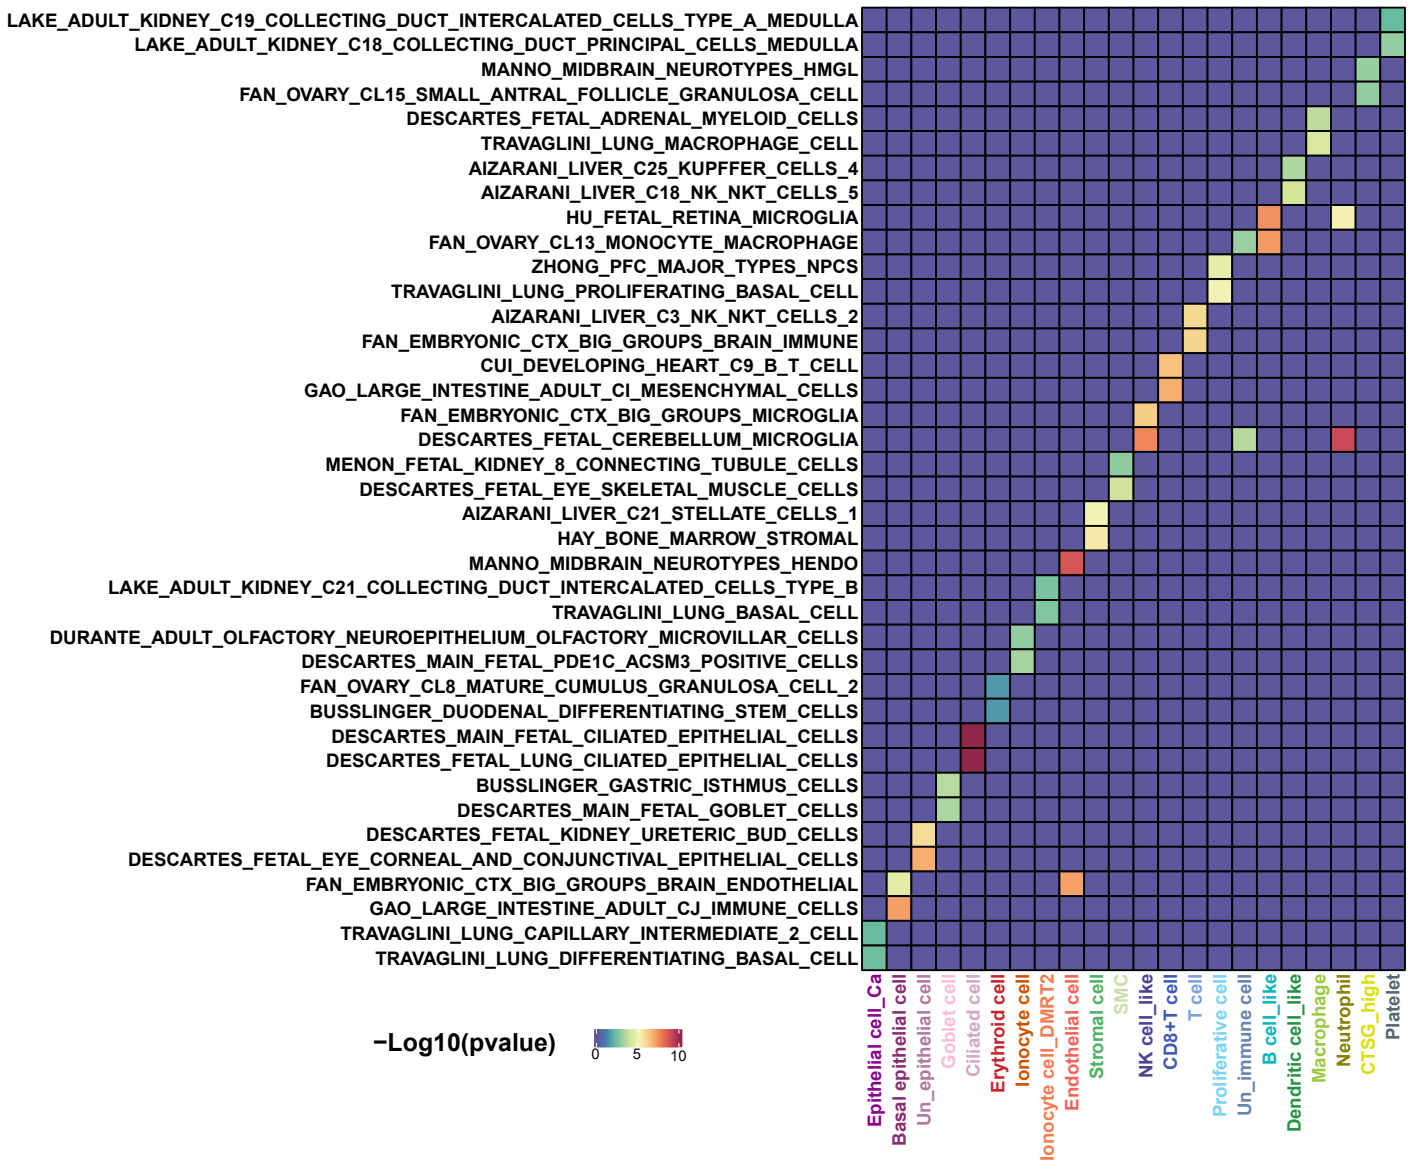

**Supplementary Figure 2 | Heatmap of top 2 GSEA terms of DEGs in the lung and gill. a,** Heatmap of top 2 GSEA terms of DEGs in the lung. GSEA denotes Gene Set Enrichment Analysis; DEG, differentially expressed gene. The color gradient in the legend represents the  $-\log_{10}(\text{p-value})$ . GSEA analysis uses weighted Kolmogorov–Smirnov statistic method. The Benjamini-Hochberg (BH) adjustment method is used by default. Pvalue is lower than 0.05. **b,** Heatmap of top GSEA terms of DEGs in the gill. Annotated as in Fig.1h. Source data are provided as a Source Data file.

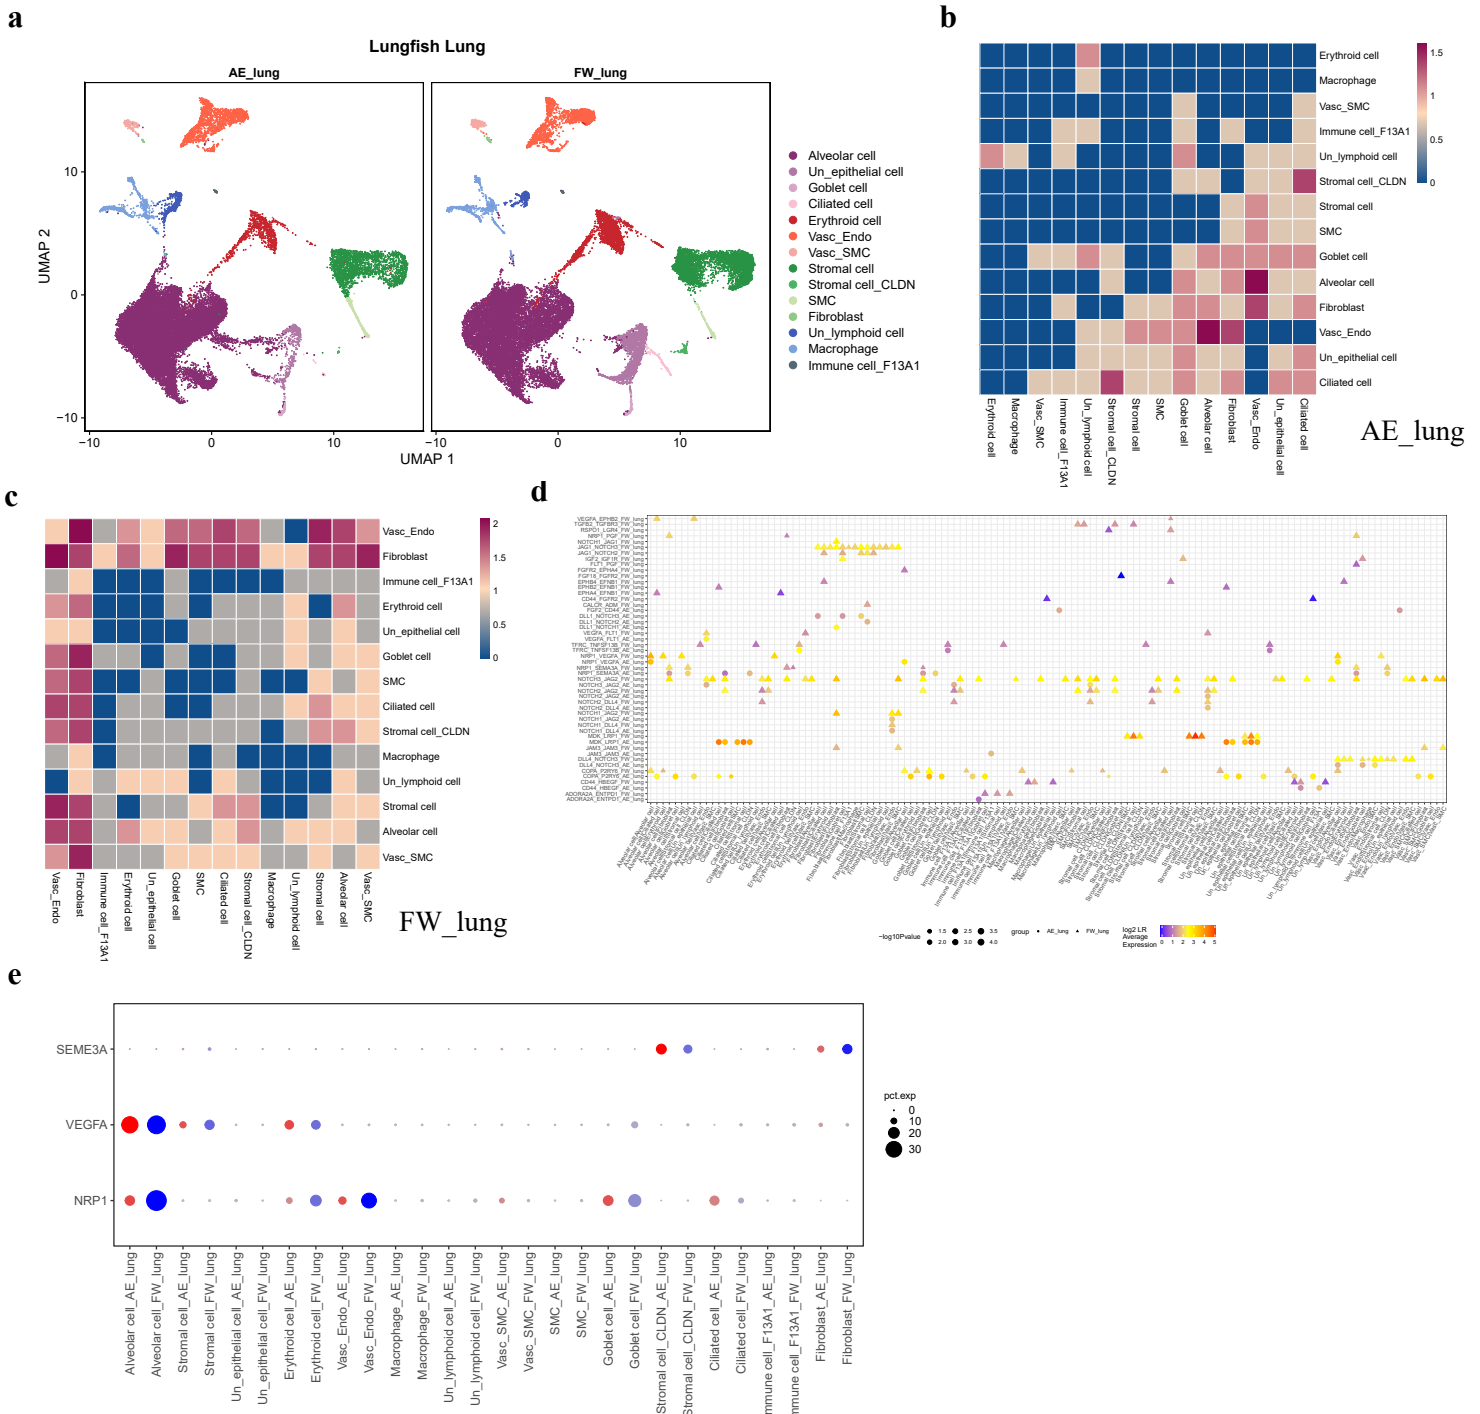

### Supplementary Figure 3 | Cellular and molecular features of lungfish lungs during terrestrialization.

**a**, Uniform Manifold Approximation and Projection of lung cell types from single individuals. Cells are color-coded by cluster cell type. Each dot represents a cell, and different colors are associated with specific cell types. **b**, Heatmap of log-normalized numbers of CellPhoneDB ligand-receptor pairs (LR pairs) between cell types in terrestrialized lungfish lung. **c**, Heatmap of log-normalized numbers of CellPhoneDB ligand-receptor pairs (LR pairs) between cell types in freshwater lungfish lung. **d**, Plot showing the expression of all LR pairs in lung cell types from freshwater (FW) and terrestrialized (AE) lungfish. Circle (AE) or triangle (FW) size reflects the percentage of cells within a cell type which express the specific genes. The color of circles/triangles indicates the average expression of the LR pair. P-values are calculated by CellphoneDB, which means the likelihood of cell-type specificity of a given receptor–ligand pairs. **e**, Bubble plot of selected genes in comparisons between freshwater and terrestrialized lung cell types. AE denotes terrestrialization (red bubbles); FW, freshwater (blue bubbles). Circle size reflects the percentage of cells within a cell type which express the specific genes.

**a**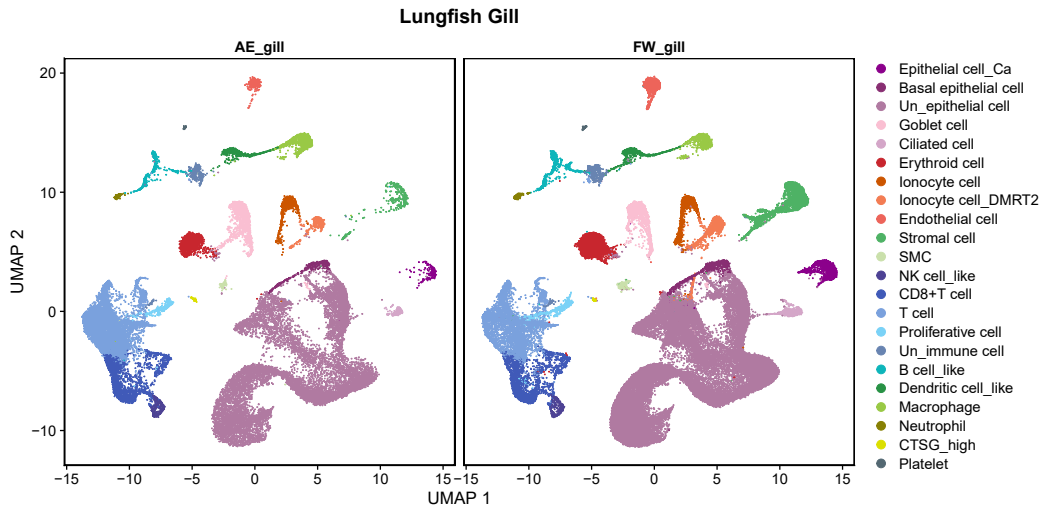**b**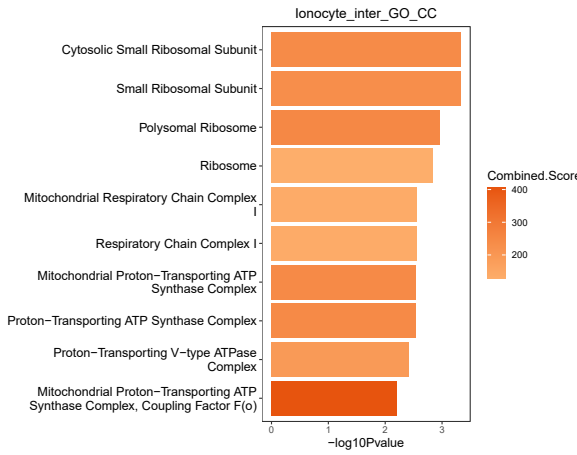**c**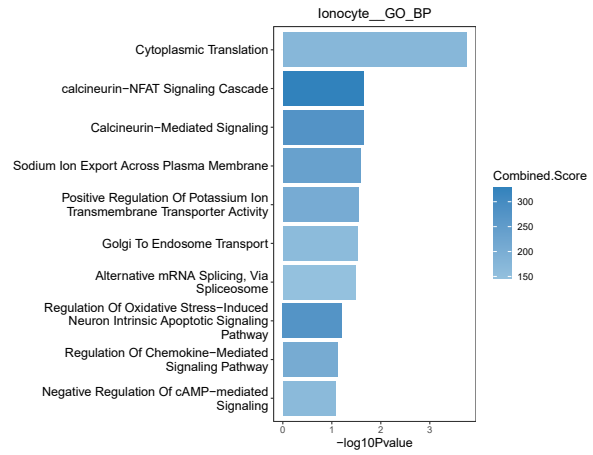**d**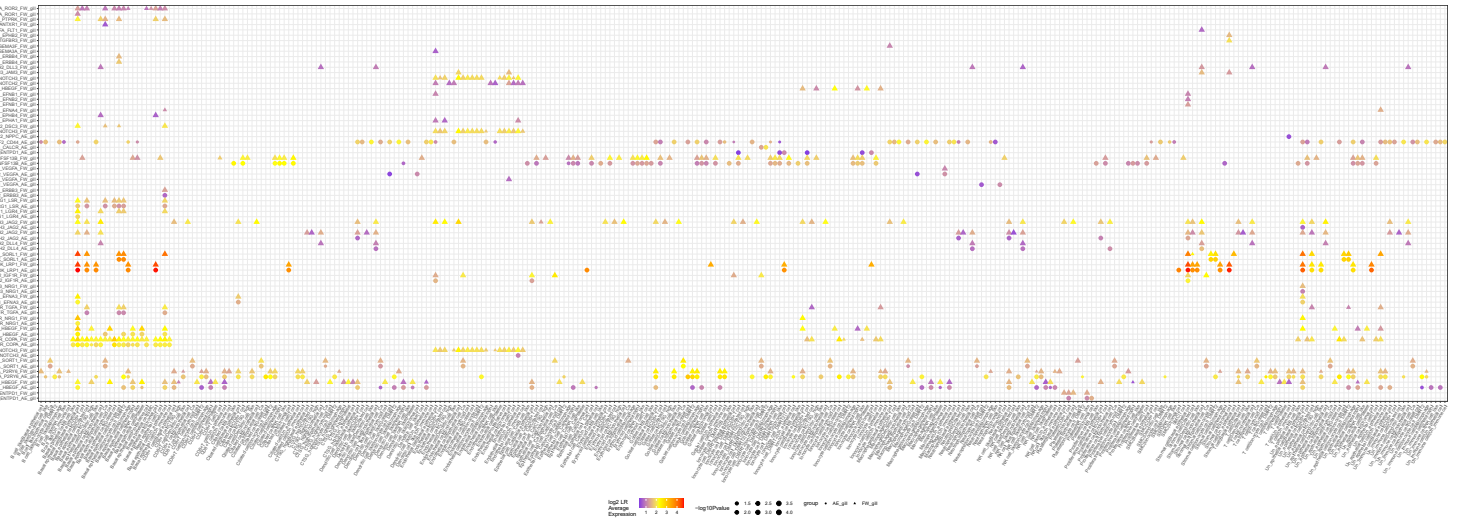**e**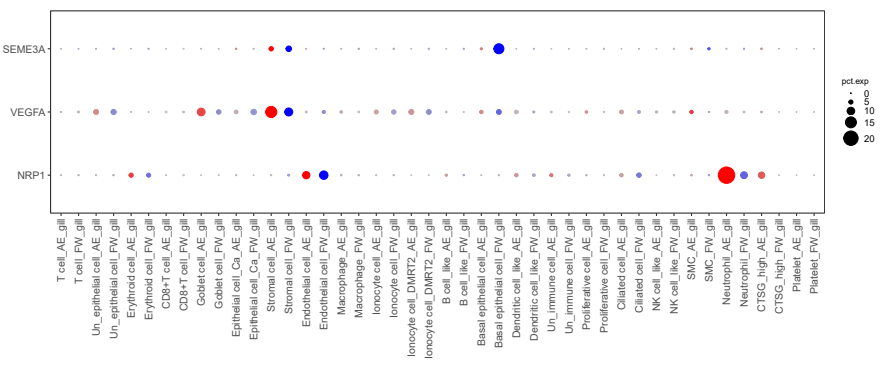

**Supplementary Figure 4 | Cellular and molecular features of lungfish gills during terrestrialization.** **a**, Uniform Manifold Approximation and Projection of gill cell types from single individuals. Annotated as in Supplementary Figure 2a. **b**, Enriched GO cellular component of downregulated DEGs of ionocyte cell and ionocyte\_DMRT2 cell. The enrichment analysis is generated using Enrichr web server, which take the Fisher exact test, and the Benjamini-Hochberg (BH) was used for correction for multiple hypotheses testing. Pvalues are indicated on the x-axis. **c**, Enriched biological processes of the Ionocyte\_Down DEGs. Generated using the Enrichr web server. Annotated as in Supplementary Figure 3b. **d**, Plot showing the expression of all LR pairs in gill cell types of freshwater (FW) and terrestrialized (AE) lungfish. Annotated as in Supplementary Figure 2d. **e**, Bubble plot of selected genes in comparisons between freshwater and terrestrialized gill cell types. Annotated as in Supplementary Figure 2e.



**a**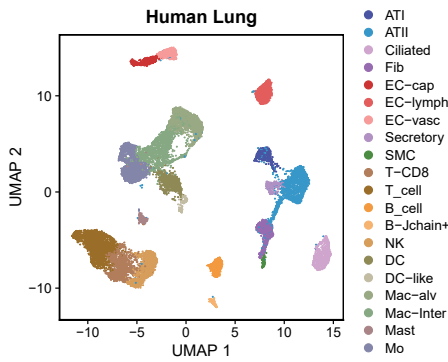**b**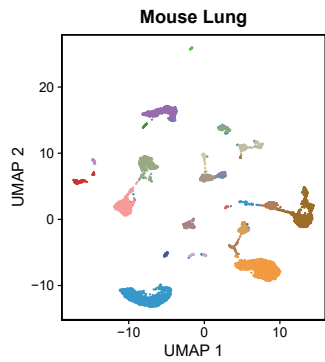**c**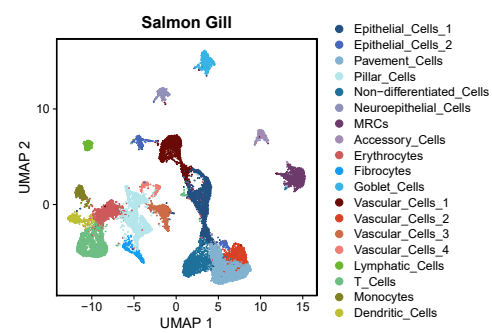**d**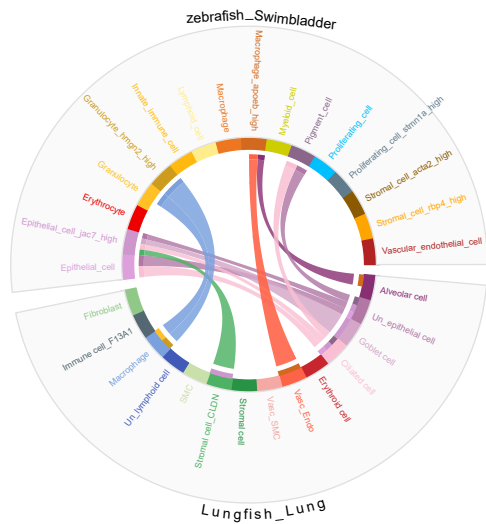**e**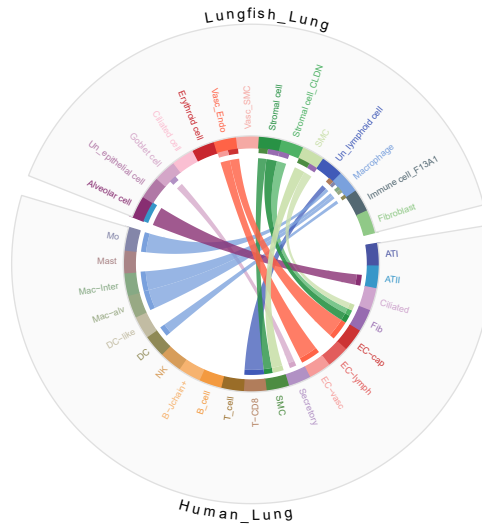**f**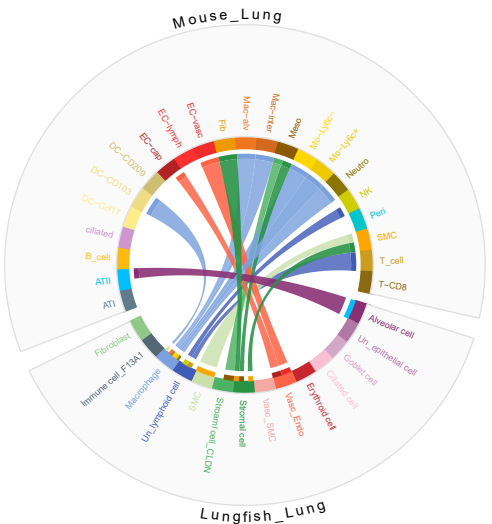**g**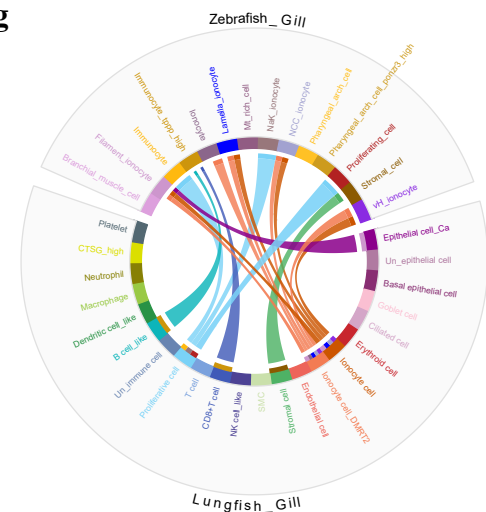**h**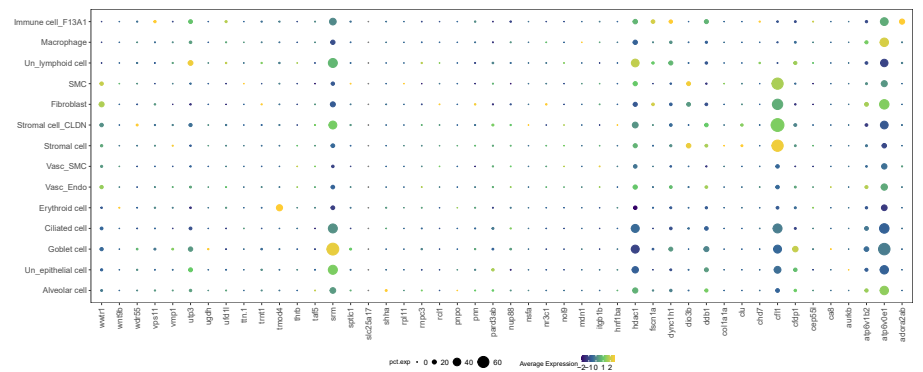**i**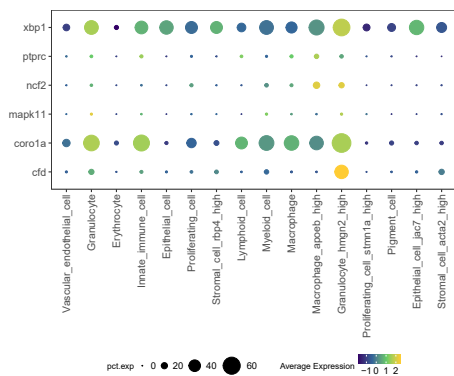**j**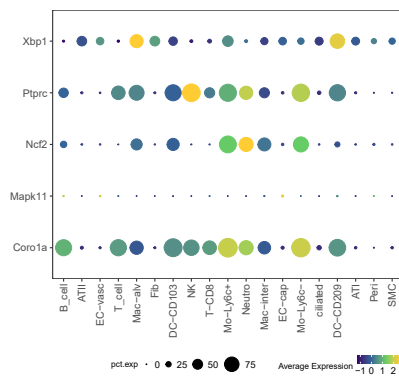**k**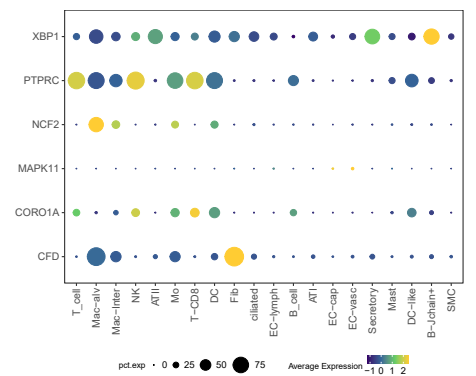

**Supplementary Figure 5 | Cell type evolution of the lung and gill.** **a**, Uniform Manifold Approximation and Projection of human lung cell types. Cells are color-coded by cluster cell type. Each dot represents a cell, and different colors are associated with specific cell types. **b**, Uniform Manifold Approximation and Projection of mouse lung cell types. Annotated as in **a**. **c**, Uniform Manifold Approximation and Projection of salmon gill cell types. Annotated as in **a**. **d**, Cell-cell similarities between the lungfish lung and Atlantic salmon swimbladder. The top 5% highest Kullback–Leibler divergence (KDL) values are indicated as arches connecting cell types. **e**, Cell-cell similarities between the lungfish lung and human lung. Annotated as in **d**. **f**, Cell-cell similarities between the lungfish lung and mouse lung. Annotated as in **d**. **g**, Cell-cell similarities between the lungfish gill and zebrafish gill. Annotated as in **d**. **h**, Bubble plot of 49 orthologous genes from ZFIN database related to phenotype of zebrafish swim bladder. Annotated as in Supplementary Figure 1a. **i-k**, Bubble plot showing the expression of selected DEGs in lungfish-zebrafish-human-mouse comparisons in the zebrafish swim bladder, mouse lung and human lung. Annotated as in Fig.4e.

**a**

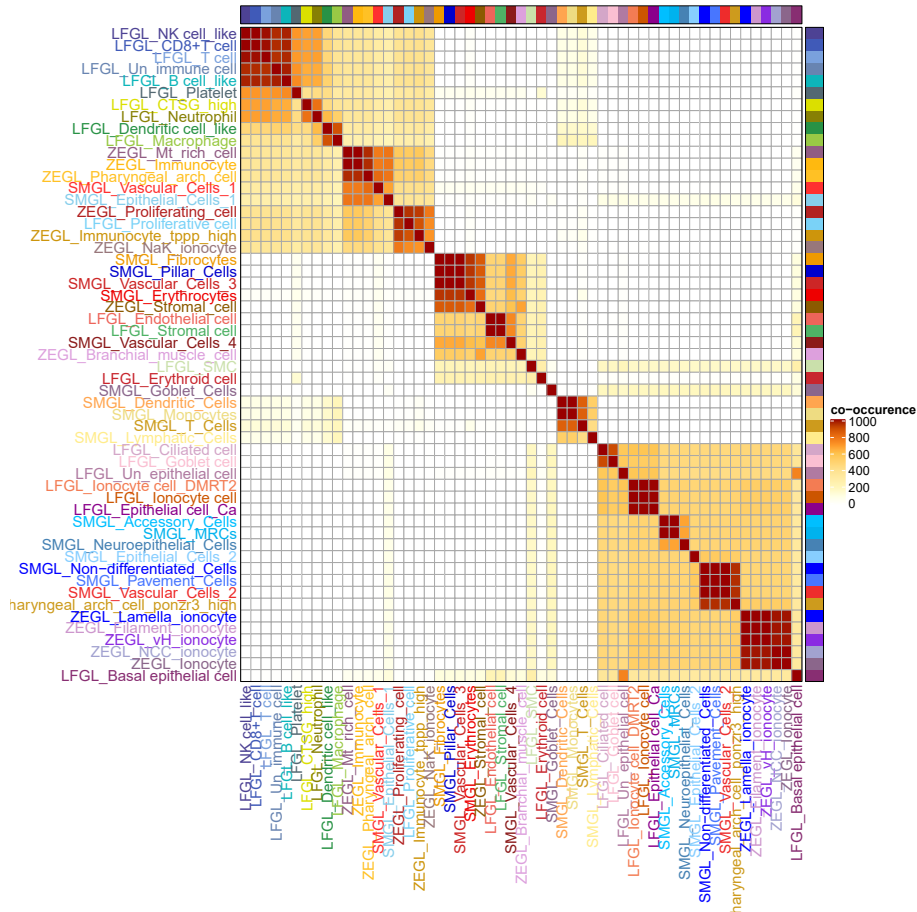

**b**

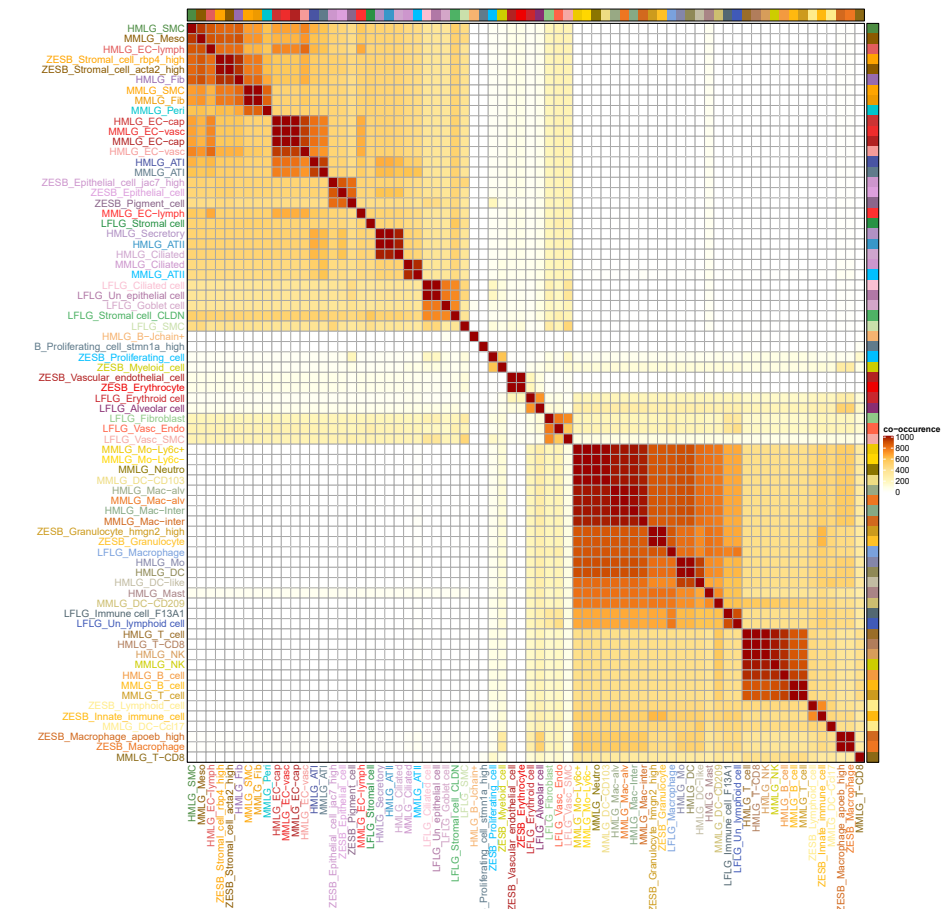

**Supplementary Figure 6 | Cell type similarity between species.** a, Heatmap showing cell type similarity between the gills of the lungfish (LFGL), salmon (SMGL), and zebrafish (Z EGL). Colors in top and right annotations represent different cell types. b, Heatmap showing cell type similarity between lungfish lung (LFLG), mouse lung (MMLG), human lung (HMLG), and zebrafish swim bladder (ZESB). Annotated as in a.
